# Supplementary material for: Ethical and sociocultural challenges in managing dead bodies during epidemics and natural disasters
Source: PubMed Central journal article supplement — BMJ Glob Health. 2021 Nov 5;6(11):e006345. doi: 10.1136/bmjgh-2021-006345 (PMC8573672; doi:10.1136/bmjgh-2021-006345), 2021-11-05
Supplement: bmjgh-2021-006345supp001.pdf [file bmjgh-2021-006345supp001.pdf]

### Full search strategies

Medline(OvidSP)[1946-present]

| # ▲ | Searches                                                                                                                                                                                                                | Results |
|-----|-------------------------------------------------------------------------------------------------------------------------------------------------------------------------------------------------------------------------|---------|
| 1   | Coronavirus Infections/                                                                                                                                                                                                 | 44730   |
| 2   | COVID-19/                                                                                                                                                                                                               | 70075   |
| 3   | (coronavirus or COVID-19 or 2019nCoV or 2019-nCoV or WN-CoV or nCoV or SARS-CoV-2 or HCoV-19).ti,ab,kw.                                                                                                                 | 130545  |
| 4   | epidemics/ or pandemics/                                                                                                                                                                                                | 65250   |
| 5   | exp Natural Disasters/                                                                                                                                                                                                  | 19103   |
| 6   | Relief Work/                                                                                                                                                                                                            | 4067    |
| 7   | disease outbreaks/ or (epidemic? or pandemic? or outbreak? or crisis? or emergency or emergencies).ti,ab,kw.                                                                                                            | 627760  |
| 8   | exp hemorrhagic fevers, viral/                                                                                                                                                                                          | 29307   |
| 9   | Chikungunya Fever/                                                                                                                                                                                                      | 2149    |
| 10  | Cholera/                                                                                                                                                                                                                | 8787    |
| 11  | Hendra Virus/ or Nipah Virus/ or Marburgvirus/                                                                                                                                                                          | 1313    |
| 12  | exp Influenza, Human/                                                                                                                                                                                                   | 51242   |
| 13  | exp Meningitis/                                                                                                                                                                                                         | 56264   |
| 14  | Coronavirus Infections/                                                                                                                                                                                                 | 44730   |
| 15  | Middle East Respiratory Syndrome Coronavirus/                                                                                                                                                                           | 1571    |
| 16  | Monkeypox/                                                                                                                                                                                                              | 258     |
| 17  | Plague/                                                                                                                                                                                                                 | 5307    |
| 18  | SARS Virus/ or Severe Acute Respiratory Syndrome/                                                                                                                                                                       | 7435    |
| 19  | Smallpox/                                                                                                                                                                                                               | 5949    |
| 20  | Tularemia/                                                                                                                                                                                                              | 3447    |
| 21  | (chikungunya or cholera or hemorrhagic fever? or ebola or hendra virus or nipah virus or lassa fever or monkeypox or plague? or rift valley fever or smallpox or tularaemia or yellow fever).ti,ab,kw.                  | 76574   |
| 22  | (influenza? or flu or meningitis or meningococcal infection? or mers or middle east respiratory syndrome or sars or severe acute respiratory syndrome).ti,ab,kw.                                                        | 230940  |
| 23  | (humanitarian adj2 (crisis? or emergency or emergencies)).ti,ab,kw.                                                                                                                                                     | 853     |
| 24  | 8 or 9 or 10 or 11 or 12 or 14 or 15 or 16 or 17 or 18 or 19 or 20 or 21 or 22 or 23                                                                                                                                    | 362386  |
| 25  | 7 and 24                                                                                                                                                                                                                | 98860   |
| 26  | ((((natural or environmental) adj2 disaster?) or flood* or tsunami? or storm? or hurricane? or typhoon? or tornado? or earthquake? or landslide? or landslip? or volcano* or volcanic or drought? or famine?).ti,ab,kw. | 79221   |

|    |                                                                                                                                                                                                   |         |
|----|---------------------------------------------------------------------------------------------------------------------------------------------------------------------------------------------------|---------|
| 27 | 1 or 2 or 3 or 4 or 5 or 6 or 25 or 26                                                                                                                                                            | 287186  |
| 28 | Attitude to Death/                                                                                                                                                                                | 16348   |
| 29 | exp Funeral Rites/                                                                                                                                                                                | 2662    |
| 30 | 28 or 29                                                                                                                                                                                          | 18726   |
| 31 | 27 and 30                                                                                                                                                                                         | 207     |
| 32 | (burial? or cremation? or funeral?).ti,ab,kw.                                                                                                                                                     | 5793    |
| 33 | ((body or bodies or "the dead") adj3 (wash* or bath* or touch* or handl* or kiss* or dispos* or manag* or collect* or transport* or recover* or stor* or bury or buries or cremat*)).ti,ab,kw.    | 13920   |
| 34 | ((mass* or multi*) adj2 grave?).ti,ab,kw.                                                                                                                                                         | 299     |
| 35 | Mortuary Practice/                                                                                                                                                                                | 961     |
| 36 | Forensic Medicine/ or Forensic Pathology/                                                                                                                                                         | 26155   |
| 37 | Autopsy/                                                                                                                                                                                          | 42870   |
| 38 | ((death? or burial? or body) adj2 team?).ti,ab,kw.                                                                                                                                                | 131     |
| 39 | (mortuary or mortuaries or forensic? or pathology).ti,ab,kw.                                                                                                                                      | 368026  |
| 40 | (autops* or ((postmortem or post-mortem) adj2 exam*)).ti,ab,kw.                                                                                                                                   | 87194   |
| 41 | 32 or 33 or 34 or 35 or 36 or 37 or 38 or 39 or 40                                                                                                                                                | 497639  |
| 42 | exp Culture/                                                                                                                                                                                      | 166687  |
| 43 | exp Religion/                                                                                                                                                                                     | 62335   |
| 44 | (religion or religious or culture or cultural or tradition*).ti,ab,kw.                                                                                                                            | 1117409 |
| 45 | (stigma* or taboo* or prejudice*).ti,ab,kw.                                                                                                                                                       | 48283   |
| 46 | (rite? or ritual? or ceremon*).ti,ab,kw.                                                                                                                                                          | 7485    |
| 47 | (respect* or dignity or dignified).ti,ab,kw.                                                                                                                                                      | 2801755 |
| 48 | ((family or families) adj3 (belief? or preference? or perspective? or attitud* or view* or value?)).ti,ab,kw.                                                                                     | 9689    |
| 49 | ((staff* or personnel or doctor? or physician? or nurse? or volunteer? or aide? or assistant? or worker?) adj3 (belief? or preference? or perspective? or attitud* or view* or value?)).ti,ab,kw. | 33591   |
| 50 | exp Ethics/ or es.fs.                                                                                                                                                                             | 189182  |
| 51 | (ethic* or bioethic*).ti,ab,kw.                                                                                                                                                                   | 145013  |
| 52 | 42 or 43 or 44 or 45 or 46 or 47 or 48 or 49 or 50 or 51                                                                                                                                          | 4196318 |
| 53 | 27 and 41 and 52                                                                                                                                                                                  | 680     |
| 54 | ethic*.ti.                                                                                                                                                                                        | 55073   |
| 55 | 25 and 54                                                                                                                                                                                         | 464     |
| 56 | 31 or 53 or 55                                                                                                                                                                                    | 1263    |
| 57 | exp animals/ not human/                                                                                                                                                                           | 4811437 |
| 58 | 56 not 57                                                                                                                                                                                         | 1184    |

Embase(OvidSP)[1974-present]

| # ▲ | Searches                                                                                                                                                                                                              |
|-----|-----------------------------------------------------------------------------------------------------------------------------------------------------------------------------------------------------------------------|
| 1   | coronavirus infections/                                                                                                                                                                                               |
| 2   | (coronavirus or COVID-19 or 2019nCoV or 2019-nCoV or WN-CoV or nCoV or SARS-CoV-2 or HCoV-19).ti,ab,kw.                                                                                                               |
| 3   | *epidemic/ or pandemic/ or pandemic influenza/                                                                                                                                                                        |
| 4   | natural disaster/ or earthquake/ or landslide/ or tsunami/ or volcano/                                                                                                                                                |
| 5   | Relief Work/                                                                                                                                                                                                          |
| 6   | epidemics/ or (epidemic? or pandemic? or outbreak? or crisis or emergency or emergencies).ti,ab,kw.                                                                                                                   |
| 7   | exp hemorrhagic fever/                                                                                                                                                                                                |
| 8   | cholera/                                                                                                                                                                                                              |
| 9   | exp henipavirus/                                                                                                                                                                                                      |
| 10  | middle east respiratory syndrome/ or severe acute respiratory syndrome/                                                                                                                                               |
| 11  | exp influenza/                                                                                                                                                                                                        |
| 12  | poxvirus infection/ or monkeypox/ or smallpox/                                                                                                                                                                        |
| 13  | plague/                                                                                                                                                                                                               |
| 14  | exp meningitis/                                                                                                                                                                                                       |
| 15  | tularemia/                                                                                                                                                                                                            |
| 16  | (chikungunya or cholera or hemorrhagic fever? or ebola or hendra virus or nipah virus or lassa fever or monkeypox or plague? or rift valley fever or smallpox or tularaemia or yellow fever).ti,ab,kw.                |
| 17  | (influenza? or flu or meningitis or meningococcal infection? or mers or middle east respiratory syndrome or sars or severe acute respiratory syndrome).ti,ab,kw.                                                      |
| 18  | (humanitarian adj2 (crisis or emergency or emergencies)).ti,ab,kw.                                                                                                                                                    |
| 19  | 7 or 8 or 9 or 10 or 11 or 12 or 13 or 14 or 15 or 16 or 17 or 18                                                                                                                                                     |
| 20  | 6 and 19                                                                                                                                                                                                              |
| 21  | ((natural or environmental) adj2 disaster?) or flood* or tsunami? or storm? or hurricane? or typhoon? or tornado? or earthquake? or landslide? or landslip? or volcano* or volcanic or drought? or famine?).ti,ab,kw. |
| 22  | 1 or 2 or 3 or 4 or 5 or 20 or 21                                                                                                                                                                                     |
| 23  | attitude to death/                                                                                                                                                                                                    |
| 24  | exp posthumous care/                                                                                                                                                                                                  |
| 25  | 23 or 24                                                                                                                                                                                                              |
| 26  | 22 and 25                                                                                                                                                                                                             |
| 27  | (burial? or cremation? or funeral?).ti,ab,kw.                                                                                                                                                                         |

|    |                                                                                                                                                                                                   |
|----|---------------------------------------------------------------------------------------------------------------------------------------------------------------------------------------------------|
| 28 | ((body or bodies or "the dead") adj3 (wash* or bath* or touch* or hand* or kiss* or dispos* or manag* or collect* or transport* or recover* or stor* or bury or buries or cremat*)).ti,ab,kw.     |
| 29 | ((mass* or multi*) adj2 grave?).ti,ab,kw.                                                                                                                                                         |
| 30 | forensic medicine/ or forensic science/ or forensic pathology/                                                                                                                                    |
| 31 | Autopsy/                                                                                                                                                                                          |
| 32 | ((death? or burial? or body) adj2 team?).ti,ab,kw.                                                                                                                                                |
| 33 | (mortuary or mortuaries or forensic? or pathology).ti,ab,kw.                                                                                                                                      |
| 34 | (autops* or ((postmortem or post-mortem) adj2 exam*)).ti,ab,kw.                                                                                                                                   |
| 35 | 27 or 28 or 29 or 30 or 31 or 32 or 33 or 34                                                                                                                                                      |
| 36 | ceremony/ or cultural diversity/ or cultural value/ or ritual/ or cultural sensitivity/ or cultural anthropology/ or respect/                                                                     |
| 37 | exp Religion/                                                                                                                                                                                     |
| 38 | (religion or religious or culture or cultural or tradition*).ti,ab,kw.                                                                                                                            |
| 39 | (stigma* or taboo* or prejudice*).ti,ab,kw.                                                                                                                                                       |
| 40 | (rite? or ritual? or ceremon*).ti,ab,kw.                                                                                                                                                          |
| 41 | (respect* or dignity or dignified).ti,ab,kw.                                                                                                                                                      |
| 42 | ((family or families) adj3 (belief? or preference? or perspective? or attitud* or view* or value?)).ti,ab,kw.                                                                                     |
| 43 | ((staff* or personnel or doctor? or physician? or nurse? or volunteer? or aide? or assistant? or worker?) adj3 (belief? or preference? or perspective? or attitud* or view* or value?)).ti,ab,kw. |
| 44 | exp Ethics/                                                                                                                                                                                       |
| 45 | (ethic* or bioethic*).ti,ab,kw.                                                                                                                                                                   |
| 46 | 36 or 37 or 38 or 39 or 40 or 41 or 42 or 43 or 44 or 45                                                                                                                                          |
| 47 | 22 and 35 and 46                                                                                                                                                                                  |
| 48 | ethic*.ti.                                                                                                                                                                                        |
| 49 | 20 and 48                                                                                                                                                                                         |
| 50 | 26 or 47 or 49                                                                                                                                                                                    |
| 51 | (exp animals/ or nonhuman/) not human/                                                                                                                                                            |
| 52 | 50 not 51                                                                                                                                                                                         |

PsycINFO(OvidSP)[1806-present]

| # ▲ | Searches                                                                                                | Results |
|-----|---------------------------------------------------------------------------------------------------------|---------|
| 1   | (coronavirus or COVID-19 or 2019nCoV or 2019-nCoV or WN-CoV or nCoV or SARS-CoV-2 or HCoV-19).ti,ab,hw. | 5181    |
| 2   | *epidemic/ or pandemic/ or pandemic influenza/                                                          | 2397    |
| 3   | natural disasters/                                                                                      | 5327    |

|    |                                                                                                                                                                                                                       |        |
|----|-----------------------------------------------------------------------------------------------------------------------------------------------------------------------------------------------------------------------|--------|
| 4  | (epidemic? or pandemic? or outbreak? or crisis or emergency or emergencies).ti,ab,hw.                                                                                                                                 | 87869  |
| 5  | infectious disorders/ or bacterial disorders/ or viral disorders/                                                                                                                                                     | 9985   |
| 6  | exp influenza/                                                                                                                                                                                                        | 1476   |
| 7  | exp meningitis/                                                                                                                                                                                                       | 825    |
| 8  | (chikungunya or cholera or hemorrhagic fever? or ebola or hendra virus or nipah virus or lassa fever or monkeypox or plague? or rift valley fever or smallpox or tularaemia or yellow fever).ti,ab,hw.                | 4063   |
| 9  | (influenza? or flu or meningitis or meningococcal infection? or mers or middle east respiratory syndrome or sars or severe acute respiratory syndrome).ti,ab,hw.                                                      | 6049   |
| 10 | 5 or 6                                                                                                                                                                                                                | 11303  |
| 11 | 4 and 10                                                                                                                                                                                                              | 2294   |
| 12 | ((natural or environmental) adj2 disaster?) or flood* or tsunami? or storm? or hurricane? or typhoon? or tornado? or earthquake? or landslide? or landslip? or volcano* or volcanic or drought? or famine?).ti,ab,hw. | 13779  |
| 13 | 1 or 2 or 3 or 11 or 12                                                                                                                                                                                               | 20861  |
| 14 | death attitudes/                                                                                                                                                                                                      | 3497   |
| 15 | death rites/                                                                                                                                                                                                          | 557    |
| 16 | 14 or 15                                                                                                                                                                                                              | 3965   |
| 17 | 13 and 16                                                                                                                                                                                                             | 19     |
| 18 | (burial? or cremation? or funeral?).ti,ab,hw.                                                                                                                                                                         | 1612   |
| 19 | ((body or bodies or "the dead") adj3 (wash* or bath* or touch* or hand* or kiss* or dispos* or manag* or collect* or transport* or recover* or stor* or bury or buries or cremat*).ti,ab,hw.                          | 2266   |
| 20 | ((mass* or multi*) adj2 grave?).ti,ab,hw.                                                                                                                                                                             | 34     |
| 21 | ((death? or burial? or body) adj2 team?).ti,ab,hw.                                                                                                                                                                    | 56     |
| 22 | (mortuary or mortuaries or forensic? or pathology).ti,ab,hw.                                                                                                                                                          | 66049  |
| 23 | (autops* or ((postmortem or post-mortem) adj2 exam*).ti,ab,hw.                                                                                                                                                        | 6063   |
| 24 | 18 or 19 or 20 or 21 or 22 or 23                                                                                                                                                                                      | 74364  |
| 25 | exp "culture (anthropological)"/                                                                                                                                                                                      | 158357 |
| 26 | exp religious beliefs/                                                                                                                                                                                                | 42429  |
| 27 | (religion or religious or culture or cultural or tradition*).ti,ab,hw.                                                                                                                                                | 505485 |
| 28 | (stigma* or taboo* or prejudice*).ti,ab,hw.                                                                                                                                                                           | 52715  |
| 29 | (rite? or ritual? or ceremon*).ti,ab,hw.                                                                                                                                                                              | 14030  |
| 30 | (respect* or dignity or dignified).ti,ab,hw.                                                                                                                                                                          | 255815 |
| 31 | ((family or families) adj3 (belief? or preference? or perspective? or attitud* or view* or value?).ti,ab,hw.                                                                                                          | 13485  |

|    |                                                                                                                                                                                                   |        |
|----|---------------------------------------------------------------------------------------------------------------------------------------------------------------------------------------------------|--------|
| 32 | ((staff* or personnel or doctor? or physician? or nurse? or volunteer? or aide? or assistant? or worker?) adj3 (belief? or preference? or perspective? or attitud* or view* or value?)).ti,ab,hw. | 31642  |
| 33 | (ethic* or bioethic*).ti,ab,hw.                                                                                                                                                                   | 84903  |
| 34 | exp ethics/                                                                                                                                                                                       | 54112  |
| 35 | 25 or 26 or 27 or 28 or 29 or 30 or 31 or 32 or 33 or 34                                                                                                                                          | 971026 |
| 36 | 13 and 24 and 35                                                                                                                                                                                  | 86     |
| 37 | ethic*.ti.                                                                                                                                                                                        | 25169  |
| 38 | 13 and 37                                                                                                                                                                                         | 150    |
| 39 | 17 or 36 or 38                                                                                                                                                                                    | 245    |

Science Citation Index, Social Science Citation Index & Arts & Humanities Citation Index (Web of Science Core Collection)[1900-present] – searched concurrently

|        |                           |                                                                                                                                                                                                                                                                                                                                                                                                                                                                                                                                                |
|--------|---------------------------|------------------------------------------------------------------------------------------------------------------------------------------------------------------------------------------------------------------------------------------------------------------------------------------------------------------------------------------------------------------------------------------------------------------------------------------------------------------------------------------------------------------------------------------------|
| #<br>9 | <a href="#">476</a>       | #8 AND #7 AND #6                                                                                                                                                                                                                                                                                                                                                                                                                                                                                                                               |
| #<br>8 | <a href="#">6,635,143</a> | TS=(religion or religious or culture or cultural or tradition*) OR TS=(stigma* or taboo* or prejudice*) OR TS=(rite or rites or ritual or rituals or ceremon*) OR TS=(respect* or dignity or dignified) OR TS=((family or families) NEAR/3 (belief* or preference* or perspective* or attitud* or view* or value*)) OR TS=((staff* or personnel or doctor* or physician* or nurse* or volunteer* or aide* or assistant* or worker*)NEAR/3 (belief* or preference* or perspective* or attitud* or view* or value*)) OR TS=(ethic* or bioethic*) |
| #<br>7 | <a href="#">502,736</a>   | TS=(burial* or cremation* or funeral*) OR TS=((body or bodies or "the dead") NEAR/3 (wash* or bath* or touch* or handl* or kiss* or dispos* or manag* or collect* or transport* or recover* or stor* or bury or buries or cremat*)) OR TS=((mass* or multi*) NEAR/2 grave*) OR TS=((death* or burial* or body) NEAR/2 team*) OR TS=(mortuary or mortuaries or forensic* or pathology) OR TS=(autops* or ((postmortem or post-mortem) NEAR/2 exam*))                                                                                            |
| #<br>6 | <a href="#">150,953</a>   | #5 OR #4 OR #3 OR #2 OR #1                                                                                                                                                                                                                                                                                                                                                                                                                                                                                                                     |

|        |                         |                                                                                                                                                                                                                                                                                                                                    |
|--------|-------------------------|------------------------------------------------------------------------------------------------------------------------------------------------------------------------------------------------------------------------------------------------------------------------------------------------------------------------------------|
| #<br>5 | <a href="#">17,799</a>  | TS=((epidemic* or pandemic* or outbreak* or crisis or crises or emergency or emergencies) AND (((natural or environmental) NEAR/2 disaster*) or flood* or tsunami* or storm* or hurricane* or typhoon* or tornado* or earthquake* or landslide* or landslip* or volcano* or volcanic or drought* or famine*))                      |
| #<br>4 | <a href="#">1,362</a>   | TS=((epidemic* or pandemic* or outbreak* or crisis or crises or emergency or emergencies) AND (humanitarian NEAR/2 (crisis or crises or emergency or emergencies) ))                                                                                                                                                               |
| #<br>3 | <a href="#">29,445</a>  | TS=((epidemic* or pandemic* or outbreak* or crisis or crises or emergency or emergencies) AND (influenza? or flu or meningitis or "meningococcal infection*" or mers or "middle east respiratory syndrome" or sars or "severe acute respiratory syndrome" ) )                                                                      |
| #<br>2 | <a href="#">18,667</a>  | TS=((epidemic* or pandemic* or outbreak* or crisis or crises or emergency or emergencies) AND (chikungunya or cholera or "hemorrhagic fever*" or "haemorrhagic fever*" or ebola or "hendra virus" or "nipah virus" or "lassa fever" or monkeypox or plague? or "rift valley fever" or smallpox or tularaemia or "yellow fever" ) ) |
| #<br>1 | <a href="#">106,189</a> | TS=(2019-ncov or ncov19 or ncov-19 or 2019-novel CoV or sars-cov2 or sars-cov-2 or sarscov2 or sarscov-2 or coronavirus* or covid19 or covid-19 or "covid 2019")                                                                                                                                                                   |

## Philosophers Index(EBSCOHost)

|    |                                                                                                                                                                                                                                                                                                                                                                                                                                                         |      |
|----|---------------------------------------------------------------------------------------------------------------------------------------------------------------------------------------------------------------------------------------------------------------------------------------------------------------------------------------------------------------------------------------------------------------------------------------------------------|------|
| S1 | TX epidemic* or pandemic* or outbreak* or crisis or crises or emergency or emergencies or coronavirus or covid-19                                                                                                                                                                                                                                                                                                                                       | 7498 |
| S2 | TX ( (burial* or cremation* or funeral* ) ) OR TX ( ((body or bodies or "the dead") N3 (wash* or bath* or touch* or hand* or kiss* or dispos* or manag* or collect* or transport* or recover* or stor* or bury or buries or cremat* ) ) OR TX ( ((mass* or multi*) N2 grave*) or (mortuary or mortuaries or forensic* or pathology) ) OR TX ( ((death* or burial* or body) N2 team* ) ) OR TX ( (autops* or ((postmortem or post-mortem) N2 exam* ) ) ) | 1412 |
| S3 | S1 and S2                                                                                                                                                                                                                                                                                                                                                                                                                                               | 39   |

Applies Social Sciences Index and Abstracts(ASSIA), Sociological Abstracts and International Bibliography of the Social Sciences (IBSS) (Proquest)[1951-present] – searched concurrently

|    |                                                                                                                                                                                                                                                                                                                                                                                                                                                                                                                                                                    |             |           |
|----|--------------------------------------------------------------------------------------------------------------------------------------------------------------------------------------------------------------------------------------------------------------------------------------------------------------------------------------------------------------------------------------------------------------------------------------------------------------------------------------------------------------------------------------------------------------------|-------------|-----------|
| S4 | S1 AND S2 AND S3                                                                                                                                                                                                                                                                                                                                                                                                                                                                                                                                                   | 3 databases | 74        |
| S3 | noft((religion or religious or culture or cultural or tradition*)) OR noft((stigma* or taboo* or prejudice*)) OR noft((rite or rites or ritual or rituals or ceremon*)) OR noft((respect* or dignity or dignified)) OR noft(((family or families) NEAR/3 (belief* or preference* or perspective* or attitud* or view* or value*))) OR noft(((staff* or personnel or doctor* or physician* or nurse* or volunteer* or aide* or assistant* or worker*) NEAR/3 (belief* or preference* or perspective* or attitud* or view* or value*))) OR noft(ethic* or bioethic*) | 3 databases | 1,802,037 |
| S2 | noft((burial* or cremation* or funeral*)) OR noft(((body or bodies or "the dead") NEAR/3 (wash* or bath* or touch* or hand* or kiss* or dispos* or manag* or collect* or transport* or recover* or stor* or bury or buries or cremat*)) OR noft(((mass* or multi*) NEAR/2 grave*)) OR noft(((death* or burial* or body) NEAR/2 team*)) OR noft((mortuary or mortuaries or forensic* or pathology)) OR noft((autops* or ((postmortem or post-mortem) NEAR/2 exam*)))                                                                                                | 3 databases | 43,381    |



|    |                                                                                                                                                                                                                                                                                                                                                                                                                                                                                                                                                                                                                                                                                                                                                                                                                                                                                                                                                                                                                                                                                                                                                                  |             |        |
|----|------------------------------------------------------------------------------------------------------------------------------------------------------------------------------------------------------------------------------------------------------------------------------------------------------------------------------------------------------------------------------------------------------------------------------------------------------------------------------------------------------------------------------------------------------------------------------------------------------------------------------------------------------------------------------------------------------------------------------------------------------------------------------------------------------------------------------------------------------------------------------------------------------------------------------------------------------------------------------------------------------------------------------------------------------------------------------------------------------------------------------------------------------------------|-------------|--------|
| S1 | noft(((epidemic* or pandemic* or outbreak* or crisis or crises or emergency or emergencies) AND (chikungunya or cholera or ("hemorrhagic fever" OR "hemorrhagic fevers") or ("haemorrhagic fever") or ebola or "hendra virus" or "nipah virus" or "lassa fever" or monkeypox or plague? or "rift valley fever" or smallpox or tularaemia or "yellow fever")))) OR noft(((epidemic* or pandemic* or outbreak* or crisis or crises or emergency or emergencies) AND (influenza? or flu or meningitis or ("meningococcal infection") or mers or "middle east respiratory syndrome" or sars or "severe acute respiratory syndrome")))) OR noft(((epidemic* or pandemic* or outbreak* or crisis or crises or emergency or emergencies) AND (humanitarian NEAR/2 (crisis or crises or emergency or emergencies)))) OR noft(((epidemic* or pandemic* or outbreak* or crisis or crises or emergency or emergencies) AND (((natural or environmental) NEAR/2 disaster*) or flood* or tsunami* or storm* or hurricane* or typhoon* or tornado* or earthquake* or lanslide* or landslip* or volcano* or volcanic or drought* or famine*))) or noft(coronavirus or covid-19) | 3 databases | 16,183 |
|----|------------------------------------------------------------------------------------------------------------------------------------------------------------------------------------------------------------------------------------------------------------------------------------------------------------------------------------------------------------------------------------------------------------------------------------------------------------------------------------------------------------------------------------------------------------------------------------------------------------------------------------------------------------------------------------------------------------------------------------------------------------------------------------------------------------------------------------------------------------------------------------------------------------------------------------------------------------------------------------------------------------------------------------------------------------------------------------------------------------------------------------------------------------------|-------------|--------|

medrxiv <https://mcguinlu.shinyapps.io/medrxiv/>

|                                                                      |     |
|----------------------------------------------------------------------|-----|
| funeral OR cremation OR burial                                       | 13  |
| (body OR bodies OR dead) AND (wash OR washing OR bathe OR bathing)   | 21  |
| (body OR bodies OR dead) AND (touch OR touching OR kiss OR kissing)  | 6   |
| (body OR bodies OR dead) AND (bury OR buries OR cremate OR cremated) | 4   |
| (grave OR graves OR mortuary OR mortuaries)                          | 27  |
| (postmortem exam OR post-mortem exam OR autopsy)                     | 51  |
|                                                                      | 122 |
